# Supplementary material
Source: PubMed Central journal article supplement (PMC4460468)
Supplement: pnas.201506646SI.pdf [file pnas.201506646SI.pdf]

# Supporting Information

Sawyer et al. 10.1073/pnas.1506646112

**Table S1. Commercial reagents and concentrations for immunohistochemistry**

| Primary antibody                                                                 | Secondary antibody                                                            | Normal serum                                 |
|----------------------------------------------------------------------------------|-------------------------------------------------------------------------------|----------------------------------------------|
| Polyclonal guinea pig anti-vGlut1 1:5,000<br>Catalog: 135 304 (Synaptic Systems) | Biotinylated goat anti-guinea pig IgG 1:500<br>Catalog: BA-7000 (Vector Labs) | Goat serum<br>Catalog: S1000 (Vector Labs)   |
| Mouse monoclonal anti-vGlut2 1:5,000<br>Catalog: MAB5504 (Millipore)             | Biotinylated horse anti-mouse IgG 1:500<br>Catalog: BA-2000 (Vector Labs)     | Horse serum<br>Catalog: S2000 (Vector Labs)  |
| Polyclonal goat anti-CTB 1:5,000<br>Catalog: 703 (List Biological Laboratories)  | Biotinylated rabbit anti-goat IgG 1:500<br>Catalog: BA5000 (Vector Labs)      | Rabbit serum<br>Catalog: S5000 (Vector Labs) |
